# Supplementary material for: Management of failed rotator cuff repair: a systematic review
Source: HighWire-hosted journal article supplement (doi:10.1136/jisakos-2015-000027), 2016-01-01
Supplement: jisakos-2015-000027supp_appendix2.pdf [file jisakos-2015-000027supp_appendix2.pdf]

**Appendix 2A**

| Study                                   | Year | Lesion Location                            | Number of Lesions | Average Size of Lesion (SD/Range)            |
|-----------------------------------------|------|--------------------------------------------|-------------------|----------------------------------------------|
| Karthikeyan <i>et al.</i> <sup>20</sup> | 2012 | Ac (Sup and Ant-Sup zones)                 | 1                 | 154mm <sup>2</sup> (50-300mm <sup>2</sup> )  |
| McDonald <i>et al.</i> <sup>21</sup>    | 2014 | Ac or FH (Outerbridge grade IV)            | NR                | 119mm <sup>2</sup> (20-250mm <sup>2</sup> )  |
| McDonald <i>et al.</i> <sup>22</sup>    | 2013 | 30 Ac, 5 FH, 4 Ac+FH                       | NR                | 162mm <sup>2</sup> (20-378mm <sup>2</sup> )  |
| Philippon <i>et al.</i> <sup>23</sup>   | 2008 | Ac (Sup quadrant 9-3 o'clock) + FH in 1 Pt | 1-2               | 163mm <sup>2</sup> (40-240mm <sup>2</sup> )  |
| Singh <i>et al.</i> <sup>24</sup>       | 2010 | 22 cam, 3 pincer, 2 pincer+cam, 93% rim    | 1                 | “Lesions up to 300mm <sup>2</sup> ”, mean NR |

**Appendix 2B**

| Study                                   | Year | Complications                                                                           | Reoperations                                                                                                                                    |
|-----------------------------------------|------|-----------------------------------------------------------------------------------------|-------------------------------------------------------------------------------------------------------------------------------------------------|
| Karthikeyan <i>et al.</i> <sup>20</sup> | 2012 | 1 failure: avascular necrosis                                                           | All cases were re-operation after an initial arthroscopy.                                                                                       |
| McDonald <i>et al.</i> <sup>21</sup>    | 2014 | NR                                                                                      | NR                                                                                                                                              |
| McDonald <i>et al.</i> <sup>22</sup>    | 2013 | NR                                                                                      | NR                                                                                                                                              |
| Philippon <i>et al.</i> <sup>23</sup>   | 2008 | 12 failures: 6. capsulolabral adhesions; 3. myositis ossificans; 2. femoral head defect | All cases were re-operation after an initial arthroscopy. One patient underwent a total hip arthroplasty 3 years following secondary evaluation |
| Singh <i>et al.</i> <sup>24</sup>       | 2010 | NR                                                                                      | NR                                                                                                                                              |
